# Supplementary material
Source: PubMed Central journal article supplement (PMC6544854)
Supplement: supp_RA118.006983_142344_1_supp_308572_ppnb4n.pdf [file supp_RA118.006983_142344_1_supp_308572_ppnb4n.pdf]

| <b>LNcaP vs. MR49F</b> | <b>C4-2 vs. C4-2R</b> |
|------------------------|-----------------------|
| SEL1L                  | UBB                   |
| FOXA1                  | RPS19                 |
| RPS27A                 | MYC                   |
| RBPJ                   | GALNT11               |
| SNW1                   | APH1A                 |
| ADAM10                 | MIB2                  |
| IFT74                  | NCSTN                 |
| MIB1                   | APH1B                 |
| WDR12                  | MAML3                 |
| MAML1                  | PSEN1                 |
| RPS19                  | EPN1                  |
| PSEN2                  | PSEN2                 |
| NCSTN                  | SEL1L                 |
| UBB                    | CREBBP                |
| SUSD5                  | POFUT1                |
| MYC                    | ADAM17                |
| APH1A                  | RBPJ                  |
| DTX4                   | ITCH                  |
| IFT172                 | NKAP                  |
| ADAM17                 | EP300                 |
| GMDS                   | MAML1                 |
| DTX3                   | IFT74                 |
| NEURL1B                | SNW1                  |
| UBC                    | KAT2B                 |
| GALNT11                | RBM15                 |
| APH1B                  | NOTCH2                |
| CDKN1B                 | SPEN                  |
| NKAP                   | APP                   |
| ITGB1BP1               | NOTCH3                |
| KAT2B                  | IFT172                |
| KRT19                  | ITGB1BP1              |
| S1PR3                  | JAG2                  |
| GOT1                   | WDR12                 |
| MIB2                   | JAG1                  |
| NLE1                   | HES1                  |
| POFUT1                 | SUSD5                 |
| JAG2                   | DTX3                  |
| NOTCH2                 | KRT19                 |
| PSEN1                  | DTX4                  |
| PERP                   | HNF1B                 |
| NOTCH1                 | RPS27A                |
| SPEN                   | MDK                   |
| CREBBP                 | FOXA1                 |
| EP300                  | ADAM10                |
| APP                    | GOT1                  |
| MDK                    | NOTCH1                |
| NOTCH3                 | UBC                   |
| SOX9                   | GMDS                  |
| MAML3                  | CEBPA                 |
| JAG1                   | PERP                  |
| UBA52                  | CDKN1B                |
| ANXA4                  | S1PR3                 |
| EPN1                   | SOX9                  |

|        |         |
|--------|---------|
| DTX2   | NEURL1B |
| CEBPA  | UBA52   |
| ITCH   | PSENEN  |
| PSENEN | DTX2    |
| HNF1B  | NLE1    |
| RBM15  | MIB1    |
| HES1   | ANXA4   |

**Supplemental Table S1.** List of differentially expressed genes in LNCaP vs. MR49F and C4-2 vs. C4-2R. The list of genes corresponds to the heatmaps represented in Figures 3A and 3B. Genes are listed in an order matching the representative heatmap.

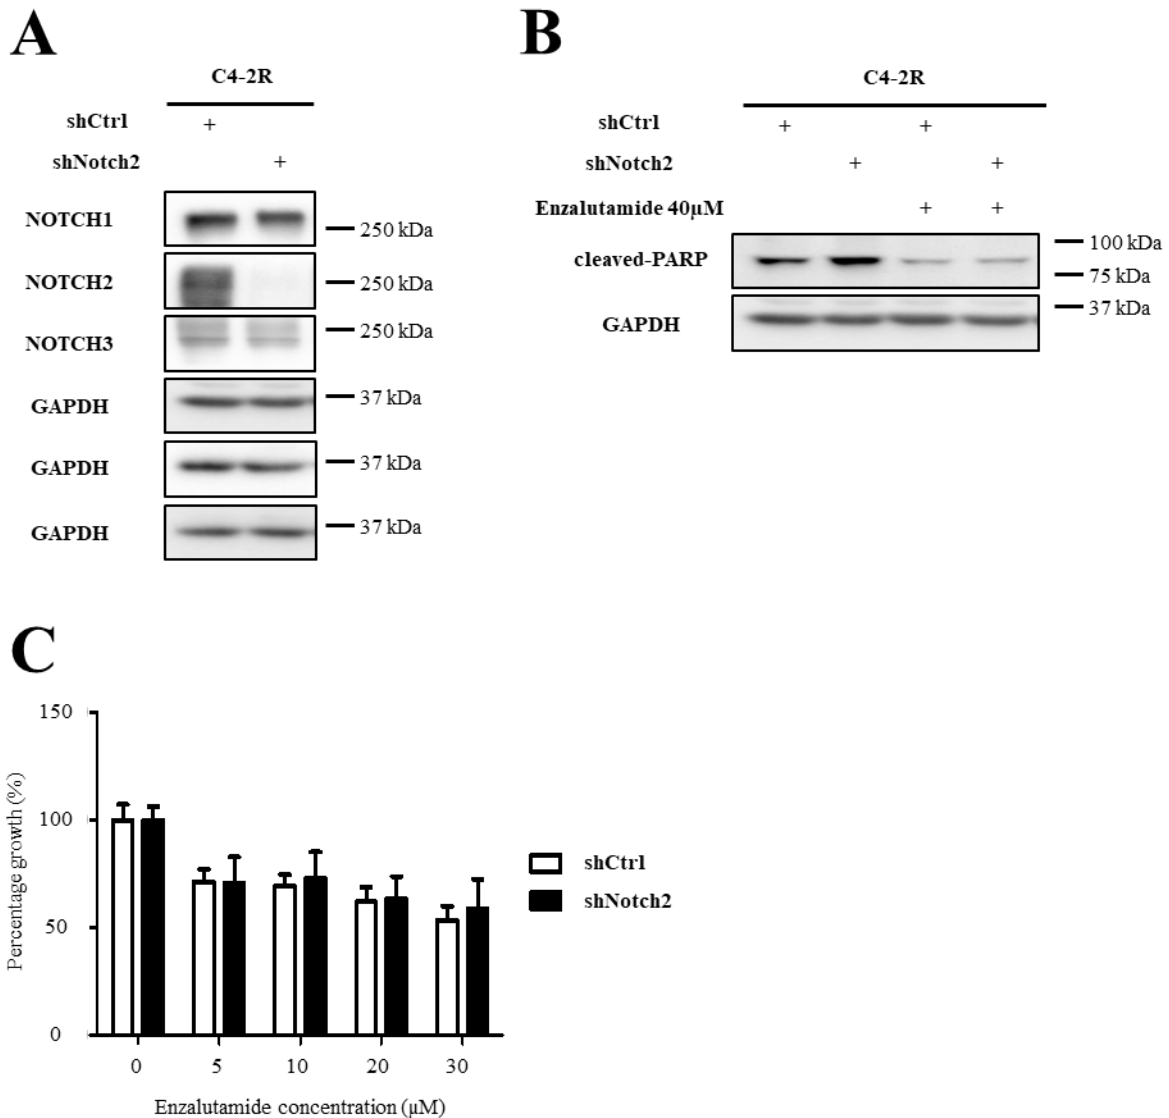

**Supplemental Figure S1.** Knockdown of Notch2 induces no changes in cleaved-PARP expression and in cell proliferation. **A**, C4-2R cells were infected with shCtrl or shNotch2 virus particles and selected with

puromycin. Cells were collected and subjected to western blot analysis with indicated antibodies. **B**, Stable C4-2R shCtrl and shNotch2 cells were treated with DMSO or 40  $\mu$ M enzalutamide for 72 hours and subjected to western blot analysis with indicated antibodies. **C**, Stable C4-2R shCtrl and shNotch2 cells were treated with DMSO or increasing concentrations of enzalutamide and subjected to MTT assay. Optical densities were measured and normalized to DMSO-treated samples.

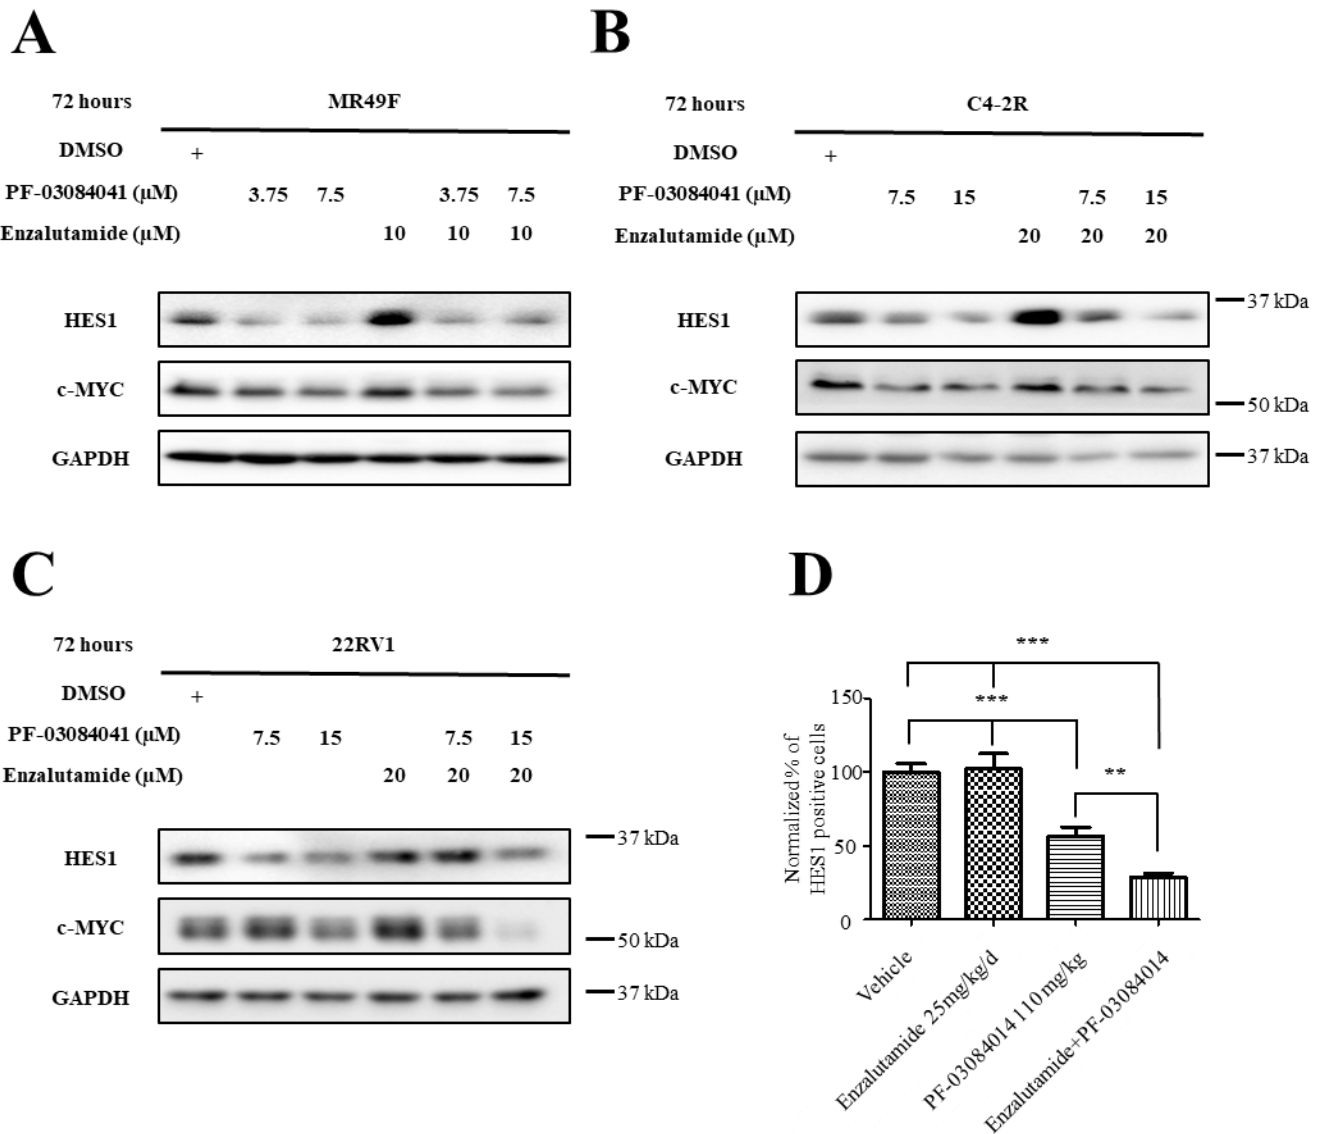

**Supplemental Figure S2.** PF-03084014 reduces the expression of Notch signaling downstream targets in enzalutamide-resistant cell lines *in vitro* and *in vivo*. **A**, **B** and **C**, MR49F, C4-2R and 22RV1 cells were treated with DMSO, PF-03084014, enzalutamide or both at the indicated concentrations for 72 hours. Cells were collected and subjected to western blot. **D**, Quantification of HES1 positively stained cells (n=3). All groups were normalized to the vehicle control group. \* indicates that p-value<0.05, \*\* indicates that p-value<0.01 and \*\*\* indicates that p-value<0.001.
